# Supplementary material for: Influence of hydraulic regimes and Cl2/NH3-N mass ratios on the bacterial structure and composition in an experimental flow cell chloraminated drinking water system
Source: Royal Society of Chemistry journal article supplement (doi:10.1039/c9ew00015a), 2019-01-01
Supplement: c9ew00015a1.pdf [file c9ew00015a1.pdf]

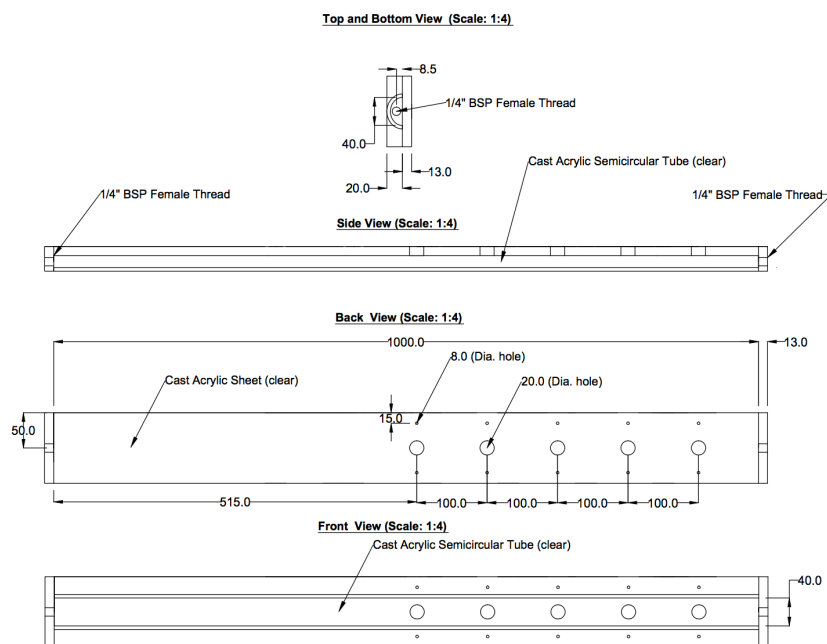

Figure S1 Design diagram of flow cell unit

Table S1 Key characteristics of the flow cells used in the study

| <b>Parameter</b>               | <b>Value</b>          |
|--------------------------------|-----------------------|
| <b>Material</b>                | Acrylic               |
| <b><math>k_s</math></b>        | 0.009 mm              |
| <b>Hydraulic diameter</b>      | 2.44 cm               |
| <b>Flow area</b>               | 6.28 cm <sup>2</sup>  |
| <b>Wetted perimeter</b>        | 10.28 cm              |
| <b>Hydraulic radius</b>        | 0.61 cm               |
| <b>Length</b>                  | 100 cm                |
| <b>Internal volume</b>         | 628.3 cm <sup>3</sup> |
| <b>Volume/Area</b>             | 100 cm                |
| <b>Biofilm sampling points</b> | 5                     |
| <b>Biofilm sampling area</b>   | 3.14 cm <sup>2</sup>  |

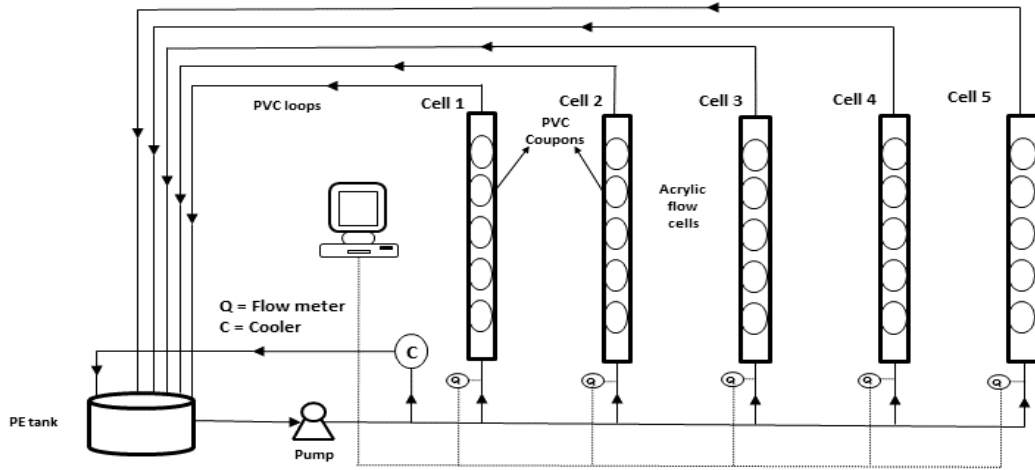

Figure S2 Schematic diagram of the flow cells during nitrification and biofilm development stage

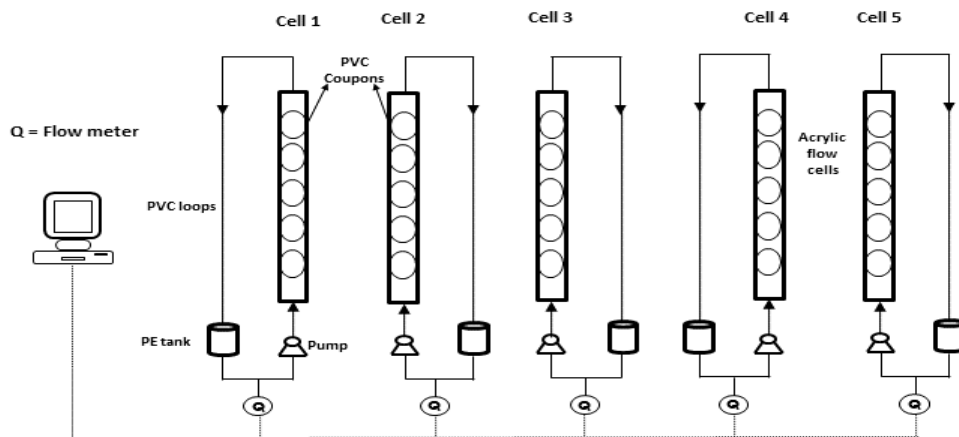

Figure S3 Schematic diagram of the flow cells during testing phases

Table S2 Dissolved oxygen(mg/L) monitored in flow cells during test phase 1 & 2

| Test phase 1 |           |        |        |        |        | Test phase 2 |           |        |        |        |        |
|--------------|-----------|--------|--------|--------|--------|--------------|-----------|--------|--------|--------|--------|
| Time (day)   | Flow cell |        |        |        |        | Time (day)   | Flow cell |        |        |        |        |
|              | 10L/min   | 8L/min | 6L/min | 4L/min | 2L/min |              | 10L/min   | 8L/min | 6L/min | 4L/min | 2L/min |
| 0            | 8.45      | 9.44   | 9.59   | 9.1    | 9.18   | 0            | 8.59      | 8.84   | 8.74   | 8.62   | 8.63   |
| 1            | 10.15     | 10.08  | 10.39  | 9.9    | 9.56   | 3            | 8.64      | 8.29   | 7.97   | 8.49   | 8      |
| 3            | 10.35     | 9.66   | 9.49   | 9.97   | 9.32   | 6            | 8.65      | 8.56   | 8.58   | 8.89   | 8.68   |
| 6            | 10.62     | 9.83   | 10.48  | 11.77  | 9.91   | 9            | 9.6       | 8      | 9.09   | 8.48   | 8.74   |
| 9            | 10.02     | 9.87   | 10.37  | 9.29   | 10.31  | 10           | 9.38      | 8.69   | 8.77   | 7.86   | 8.83   |
| 10           | 8.92      | 10.51  | 9.46   | 8.85   | 8.79   | 11           | 9.62      | 8.92   | 9.14   | 8.79   | 9.07   |
| 11           | 10.39     | 11.92  | 9.71   | 10.45  | 9.84   | 12           | 9.56      | 8.87   | 8.64   | 8.97   | 9.35   |
| 12           | 10.98     | 10.82  | 10.79  | 11.66  | 10.69  | 13           | 10.71     | 9.14   | 9.16   | 9.65   | 10.06  |
| 13           | 10.24     | 8.89   | 9.78   | 9.09   | 9.04   | 14           | 9.98      | 9.27   | 9.11   | 8.78   | 9.63   |
| 14           | 9.16      | 9.12   | 8.85   | 9.3    | 9.23   | 15           | 9.52      | 8.76   | 8.56   | 8.39   | 8.8    |
| 15           | 8.98      | 8.68   | 8.97   | 8.46   | 8.48   | 16           | 8.49      | 8.31   | 8.8    | 8.91   | 7.63   |
| 16           | 8.21      | 8.46   | 8.6    | 9.23   | 8.98   | 18           | 10.5      | 8.86   | 9.87   | 10.02  | 8.97   |
| 18           | 9.77      | 9.05   | 8.2    | 9.23   | 9.27   | 21           | 10.16     | 9.83   | 9.41   | 9.58   | 8.87   |
| 21           | 10.42     | 9.09   | 9.27   | 8.68   | 9.34   | 24           | 9.51      | 11.32  | 9.79   | 9.62   | 8.56   |
| 24           | 10.7      | 9.82   | 9.28   | 9.5    | 9.23   | 27           | 11.89     | 8.93   | 10.39  | 9.62   | 9.61   |
| 27           | 9.87      | 10.54  | 10.58  | 9.44   | 10.21  | 30           | 10.75     | 9.2    | 10.42  | 9.57   | 9.79   |
| 30           | 9.78      | 8.72   | 9.66   | 10.25  | 9.7    | 33           | 10.84     | 8.93   | 8.94   | 7.94   | 9.32   |
| 33           | 9.43      | 8.65   | 8.7    | 8.76   | 8.54   | 39           | 8.86      | 7.6    | 7.12   | 7.72   | 8.14   |

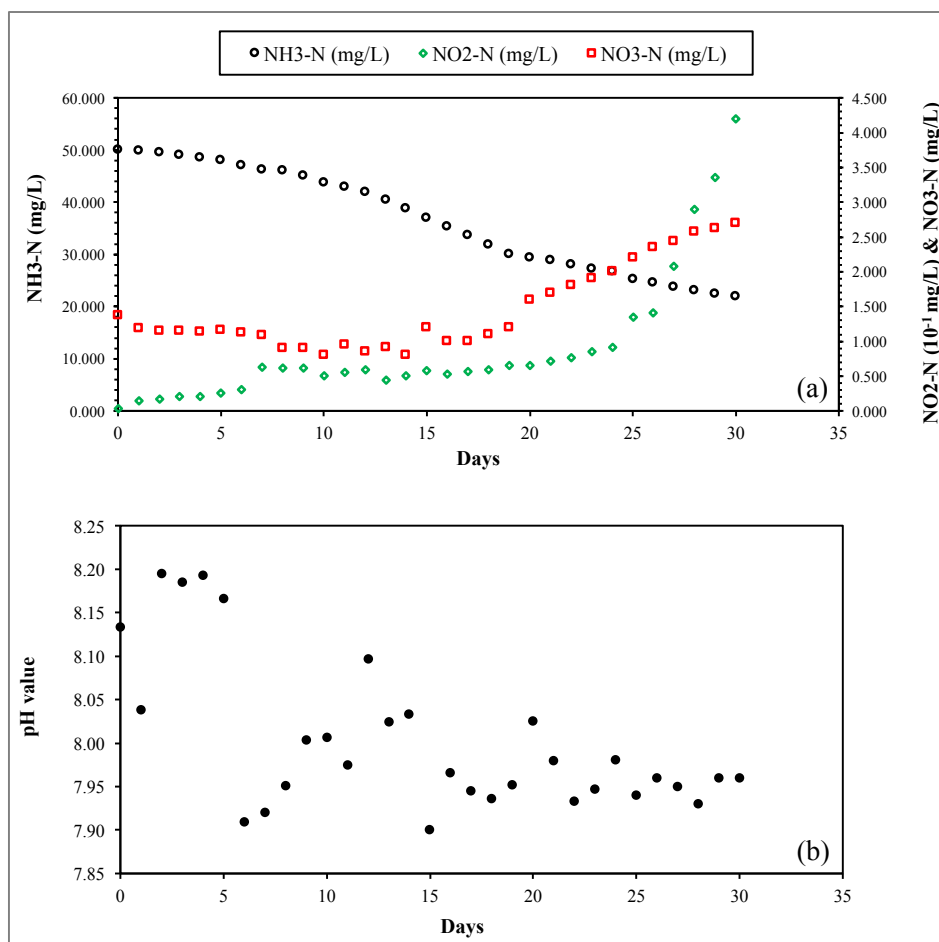

Figure S4. Water physico-chemical parameters monitored during pre-grow stage. (a) Nitrification episodes, including the concentration of ammonia nitrogen, nitrate nitrogen and nitrite nitrogen; (b) pH value.

Table S3 Data of Qubit DNA concentration and DNA quality

| Sample name | Qubit concentration<br>ng/ $\mu$ l | DIN |
|-------------|------------------------------------|-----|
| 2L_B1       | 59.8                               | 6.3 |
| 2L_BW1      | 238                                | 6.9 |
| 4L_B1       | 17.5                               | 6.6 |
| 4L_BW1      | 480                                | 1   |
| 6L_B1       | 42.8                               | 6.4 |
| 6L_BW1      | 1000                               | 1   |
| 8L_B1       | 5.63                               | 6.4 |
| 8L_BW1      | 593                                | 6.4 |
| 10L_B1      | 5.99                               | 6.2 |
| 10L_BW1     | 567                                | 4.1 |
| 2L_B2       | 228                                | 4.4 |
| 2L_BW2      | 161                                | 7.4 |
| 4L_B2       | 102                                | 1   |
| 4L_BW2      | 340                                | 6.3 |
| 6L_B2       | 236                                | 1   |
| 6L_BW2      | 585                                | 6   |
| 8L_B2       | 39.9                               | 4.1 |
| 8L_BW2      | 367.5                              | 1   |
| 10L_B2      | 70.4                               | 6   |
| 10L_BW2     | 1000                               | 6.3 |

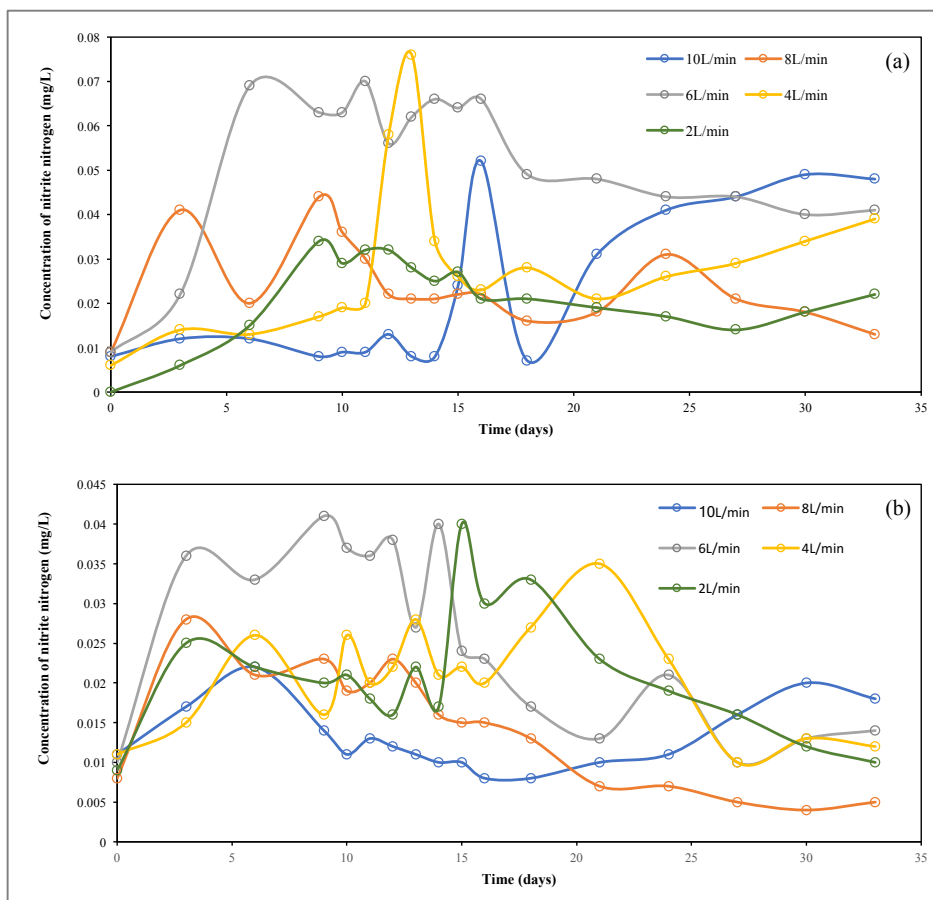

Figure S5. The concentration of nitrite nitrogen monitored in different flow cell units. (a) Test phase 1; (b) Test phase 2.
